# Supplementary material for: Injury-experienced satellite cells retain long-term enhanced regenerative capacity
Source: PubMed Central journal article supplement (PMC10496398; doi:10.1186/s13287-023-03492-4), 2023-09-12

A

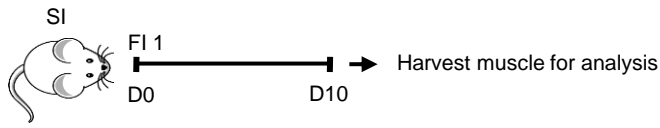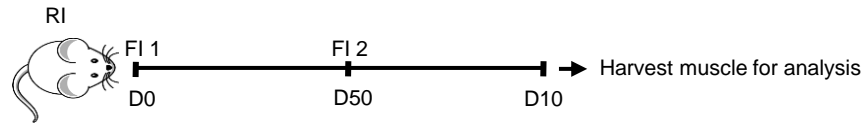

B

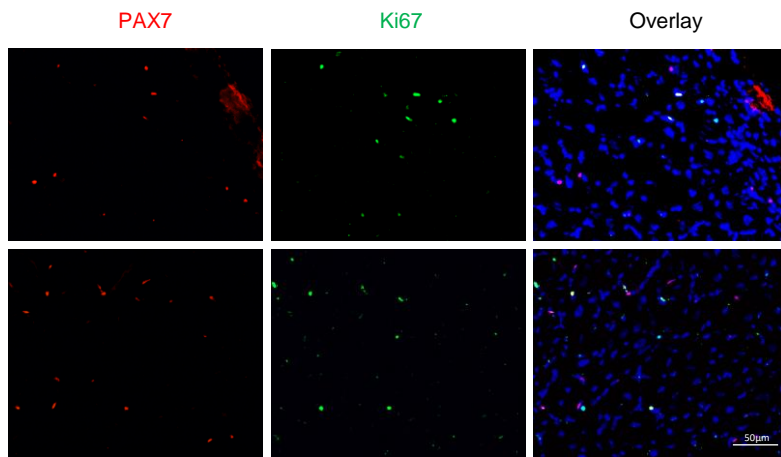

C

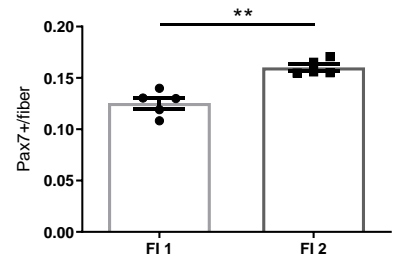

D

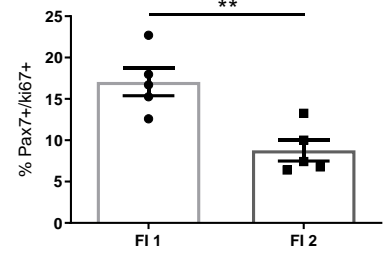

E

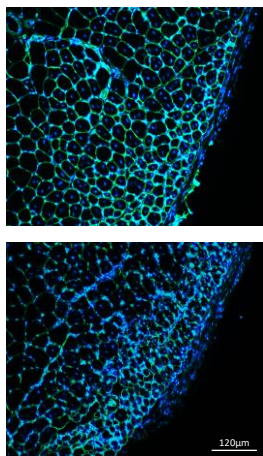

F

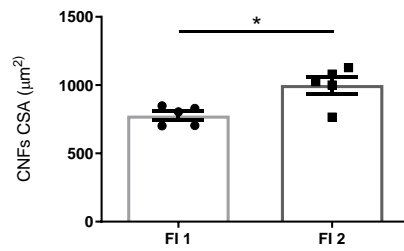

G

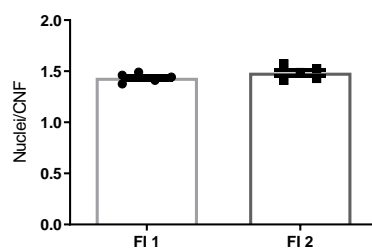

H

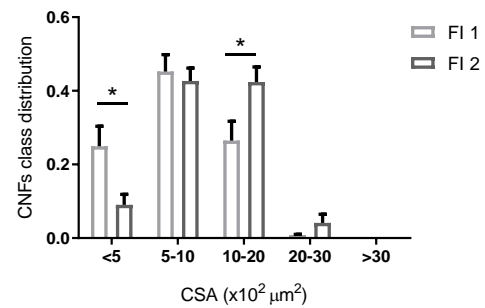

Supplement: 13287_2023_3492_MOESM4_ESM.pdf [file 13287_2023_3492_MOESM4_ESM.pdf]
